# Supplementary material for: Red analytical performance index (RAPI) and software: the missing tool for assessing methods in terms of analytical performance
Source: Royal Society of Chemistry journal article supplement (doi:10.1039/d4gc05298f), 2025-01-01
Supplement: d4gc05298f1.pdf [file d4gc05298f1.pdf]

Supplementary Material

Red Analytical Performance Index (RAPI) and software: the missing tool for assessing methods in terms of analytical performance

Paweł Mateusz Nowak<sup>a</sup>, Wojciech Wojnowski<sup>b,c</sup>, Natalia Manousi<sup>d</sup>, Victoria Samanidou<sup>d</sup>, Justyna Płotka-Wasyłka<sup>b\*</sup>

<sup>a</sup> Jagiellonian University in Kraków, Faculty of Chemistry, Department of Analytical Chemistry, Laboratory of Forensic Chemistry, Gronostajowa St. 2, 30-387 Kraków, Poland

<sup>b</sup> Department of Analytical Chemistry, Faculty of Chemistry, Gdańsk University of Technology, 11/12 G. Narutowicza Street, 80-233 Gdańsk, Poland, plotkajustyna@gmail.com

<sup>c</sup> Department of Chemistry, University of Oslo, P.O. Box 1033-Blindern, 0315 Oslo, Norway

<sup>d</sup> Laboratory of Analytical Chemistry, School of Chemistry, Aristotle University of Thessaloniki, GR 54124 Thessaloniki, Greece

Table S1. The details of assessment performed using the RAPI tool.

| Method description<br>(Analyte, sample type, instrumental technique) | Repeatability                         | Intermediate precision                 | Reproducibility           | Trueness                               | Recovery & matrix effect                               | LOQ (% of expected mean analyte concentration in the matrix) | Working range                          | Simplified linearity estimation      | Ruggedness/robustness           | Selectivity                     | Total Points | Ref. *        |
|----------------------------------------------------------------------|---------------------------------------|----------------------------------------|---------------------------|----------------------------------------|--------------------------------------------------------|--------------------------------------------------------------|----------------------------------------|--------------------------------------|---------------------------------|---------------------------------|--------------|---------------|
| Triazines/Fruit juice/HPLC-DAD                                       | c≤0.000001%<br>RSD<8%<br>Points: 10.0 | c≤0.000001%<br>RSD<16%<br>Points: 10.0 | Not tested<br>Points: 0.0 | c≤0.000001%<br>Bias<20%<br>Points: 7.5 | c≤0.000001%<br>>80, <110; acceptable ME<br>Points: 7.5 | LOQ<10%<br>Points: 5.0                                       | Wider than 100×<br>LOQ<br>Points: 10.0 | R <sup>2</sup> >0.99<br>Points: 10.0 | Not demonstrated<br>Points: 0.0 | Not demonstrated<br>Points: 0.0 | 60.0         | <sup>33</sup> |
| Triazines/Water/HP LC-DAD                                            | c≤0.000001%<br>RSD<8%<br>Points: 10.0 | c≤0.000001%<br>RSD<16%<br>Points: 10.0 | Not tested<br>Points: 0.0 | c≤0.000001%<br>Bias<20%<br>Points: 7.5 | c≤0.000001%<br>>80, <110; acceptable ME<br>Points: 7.5 | LOQ<25%<br>Points: 2.5                                       | Wider than 100×<br>LOQ<br>Points: 10.0 | R <sup>2</sup> >0.99<br>Points: 10.0 | Not demonstrated<br>Points: 0.0 | Not demonstrated<br>Points: 0.0 | 57.5         | <sup>34</sup> |
| Triazines/Herbal                                                     | c≤0.00001%                            | c≤0.00001%                             | Not tested                | c≤0.00001%                             | c≤0.00001%                                             | LOQ<25%                                                      | Wider                                  | R <sup>2</sup> >0.99                 | Not                             | Not                             | 52.5         | <sup>35</sup> |

| Method description<br>(Analyte, sample type, instrumental technique) | Repeatability                          | Intermediate precision                | Reproducibility           | Trueness                             | Recovery & matrix effect                                | LOQ (% of expected mean analyte concentration in the matrix) | Working range                        | Simplified linearity estimation      | Ruggedness/robustness                              | Selectivity                                                        | Total Points | Ref. *        |
|----------------------------------------------------------------------|----------------------------------------|---------------------------------------|---------------------------|--------------------------------------|---------------------------------------------------------|--------------------------------------------------------------|--------------------------------------|--------------------------------------|----------------------------------------------------|--------------------------------------------------------------------|--------------|---------------|
| infusion/HPLC-DAD                                                    | RSD<11.3%<br>Points: 7.5               | RSD<11.3%<br>Points: 10.0             | Points: 0.0               | Bias<10%<br>Points: 7.5              | >80, <110; acceptable ME<br>Points: 5.0                 | Points: 2.5                                                  | than 100×<br>LOQ<br>Points: 10.0     | Points: 10.0                         | demonstrated<br>Points: 0.0                        | demonstrated<br>Points: 0.0                                        |              |               |
| Histidine/Urine/HP LC-PCD-FLD                                        | c≤0.0001%<br>RSD<4.0%<br>Points: 10.0  | c≤0.0001%<br>RSD<8.0%<br>Points: 10.0 | Not tested<br>Points: 0.0 | c≤0.0001%<br>Bias<20%<br>Points: 5.0 | c≤0.0001%<br>>90, <107; acceptable ME<br>Points: 7.5    | LOQ<1%<br>Points: 10.0                                       | Wider than 30×<br>LOQ<br>Points: 7.5 | R <sup>2</sup> >0.99<br>Points: 10.0 | Demonstrated for 5 or more factors<br>Points: 10.0 | Demonstrated for 5 or more potential interferences<br>Points: 10.0 | 80.0         | <sup>36</sup> |
| Histidine/Urine/Smartphone                                           | c≤0.001%<br>RSD<8.475%<br>Points: 5.0  | c≤0.001%<br>RSD<11.3%<br>Points: 5.0  | Not tested<br>Points: 0.0 | c≤0.001%<br>Bias<40%<br>Points: 2.5  | c≤0.001%<br>>60, <115; ME study optional<br>Points: 2.5 | LOQ<1%<br>Points: 10.0                                       | Wider than 5×<br>LOQ<br>Points: 2.5  | R <sup>2</sup> >0.99<br>Points: 10.0 | Not demonstrated<br>Points: 0.0                    | Demonstrated for 5 or more potential interferences<br>Points: 10.0 | 47.5         | <sup>37</sup> |
| Histidine/Fish samples/HPLC-PCD-FLD                                  | c≤0.001%<br>RSD<2.825%<br>Points: 10.0 | c≤0.001%<br>RSD<5.7%<br>Points: 10.0  | Not tested<br>Points: 0.0 | c≤0.001%<br>Bias<20%<br>Points: 5.0  | c≤0.001%<br>>80, <110; ME study optional<br>Points: 5.0 | LOQ<1%<br>Points: 10.0                                       | Wider than 30×<br>LOQ<br>Points: 7.5 | R <sup>2</sup> >0.99<br>Points: 10.0 | Demonstrated for 5 or more factors<br>Points: 10.0 | Demonstrated for 5 or more potential interferences<br>Points: 10.0 | 77.5         | <sup>38</sup> |
| Parabens/Urine/HP LC-DAD                                             | c≤0.0001%<br>RSD<16%                   | c≤0.0001%<br>RSD<20%                  | Not tested<br>Points: 0.0 | c≤0.0001%<br>Bias<20%                | c≤0.0001%<br>>80, <110;                                 | LOQ<25%<br>Points: 2.5                                       | Wider than 100×                      | R <sup>2</sup> >0.99<br>Points:      | Demonstrated for 5 or more                         | Not demonstrated                                                   | 47.5         | <sup>39</sup> |

| Method description<br>(Analyte, sample type, instrumental technique) | Repeatability                           | Intermediate precision               | Reproducibility           | Trueness                                                    | Recovery & matrix effect                                | LOQ (% of expected mean analyte concentration in the matrix) | Working range                          | Simplified linearity estimation                      | Ruggedness/robustness                              | Selectivity                                                        | Total Points | Ref. *        |
|----------------------------------------------------------------------|-----------------------------------------|--------------------------------------|---------------------------|-------------------------------------------------------------|---------------------------------------------------------|--------------------------------------------------------------|----------------------------------------|------------------------------------------------------|----------------------------------------------------|--------------------------------------------------------------------|--------------|---------------|
|                                                                      | Points: 2.5                             | Points: 2.5                          |                           | Points: 5.0                                                 | acceptable ME<br>Points: 5.0                            |                                                              | LOQ<br>Points: 10.0                    | 10.0<br>Points: 10.0                                 | factors<br>Points: 10.0                            | ated<br>Points: 0.0                                                |              |               |
| Parabens/Urine/HP LC-DAD                                             | c≤0.001%<br>RSD≥11.3%<br>Points: 0.0    | c≤0.001%<br>RSD<14.1%<br>Points: 2.5 | Not tested<br>Points: 0.0 | c≤0.001%<br>Bias<20%<br>Points: 5.0                         | c≤0.0001%<br>>80, <110;<br>acceptable ME<br>Points: 5.0 | LOQ<25%<br>Points: 2.5                                       | Wider than 100×<br>LOQ<br>Points: 10.0 | R <sup>2</sup> >0.97<br>Points: 10.0<br>Points: 7.5  | Demonstrated for 5 or more factors<br>Points: 10.0 | Not demonstrated<br>Points: 0.0                                    | 42.5         | <sup>40</sup> |
| Parabens/Breast tissue/HPLC-DAD                                      | c≤0.00001%<br>RSD<11.3%<br>Points: 7.5  | c≤0.00001%<br>RSD<7%<br>Points: 7.5  | Not tested<br>Points: 0.0 | c≤0.00001%<br>Bias<20%<br>Points: 5.0                       | c≤0.0001%<br>>80, <110;<br>acceptable ME<br>Points: 5.0 | LOQ≥25%<br>Points: 0.0                                       | Wider than 100×<br>LOQ<br>Points: 10.0 | R <sup>2</sup> >0.99<br>Points: 10.0<br>Points: 10.0 | Not demonstrated<br>Points: 0.0                    | Not demonstrated<br>Points: 0.0                                    | 45.0         | <sup>41</sup> |
| Lead/Water/FAAS                                                      | c≤0.00001%<br>RSD<5.65%<br>Points: 10.0 | Not tested<br>Points: 0.0            | Not tested<br>Points: 0.0 | c≤0.00001%<br>Bias<10%, confirmed with CRMs<br>Points: 10.0 | c≤0.0001%<br>>90, <107;<br>acceptable ME<br>Points: 7.5 | LOQ<10%<br>Points: 5.0                                       | Wider than 30×<br>LOQ<br>Points: 7.5   | R <sup>2</sup> >0.99<br>Points: 10.0<br>Points: 10.0 | Not demonstrated<br>Points: 0.0                    | Demonstrated for 5 or more potential interferences<br>Points: 10.0 | 60.0         | <sup>42</sup> |
| Lead/Water/FAAS                                                      | c≤0.00001%<br>RSD<5.65%<br>Points: 10.0 | Not tested<br>Points: 0.0            | Not tested<br>Points: 0.0 | c≤0.00001%<br>Bias<10%, confirmed with CRMs<br>Points: 10.0 | c≤0.0001%<br>>95, <105;<br>weak ME<br>Points: 10.0      | LOQ<1%<br>Points: 10.0                                       | Wider than 30×<br>LOQ<br>Points: 7.5   | R <sup>2</sup> >0.99<br>Points: 10.0<br>Points: 10.0 | Not demonstrated<br>Points: 0.0                    | Demonstrated for 5 or more potential interferences<br>Points: 10.0 | 67.5         | <sup>43</sup> |
| Lead/Water/FAAS                                                      | c≤0.00001%                              | Not tested                           | Not tested                | c≤0.00001%                                                  | c≤0.0001%                                               | LOQ≥25%                                                      | Wider                                  | R <sup>2</sup> >0.99                                 | Not                                                | Demonstr                                                           | 60.0         | <sup>44</sup> |

| Method description<br>(Analyte, sample type, instrumental technique) | Repeatability             | Intermediate precision | Reproducibility | Trueness                                      | Recovery & matrix effect           | LOQ (% of expected mean analyte concentration in the matrix) | Working range                    | Simplified linearity estimation | Ruggedness/robustness       | Selectivity                                                | Total Points | Ref. * |
|----------------------------------------------------------------------|---------------------------|------------------------|-----------------|-----------------------------------------------|------------------------------------|--------------------------------------------------------------|----------------------------------|---------------------------------|-----------------------------|------------------------------------------------------------|--------------|--------|
|                                                                      | RSD<5.65%<br>Points: 10.0 | Points: 0.0            | Points: 0.0     | Bias<10%, confirmed with CRMs<br>Points: 10.0 | >95, <105; weak ME<br>Points: 10.0 | Points: 0.0                                                  | than 100×<br>LOQ<br>Points: 10.0 | Points: 10.0<br>Points: 10.0    | demonstrated<br>Points: 0.0 | ated for 5 or more potential interferences<br>Points: 10.0 |              |        |

\* see the main document for the literature references
